# Supplementary material
Source: publisher figshare collection journal article supplement (https://diabetesjournals.figshare.com/ndownloader/files/26067848)
Supplement: Supplementary file 1 [file 26067848]

## Online supplemental material

### *Positron Emission Tomography protocols and data acquisition*

Two  $^{15}\text{O}$ -H<sub>2</sub>O perfusion scans were initiated at time = 0 min as 6-min scans with the following time-frame sequence: 1×10, 8×5, 4×20, 2×15, 3×20, 2×30, and 2×60 s. To reconstruct images a 3-dimensional (D) iterative algorithm was used (3 iterations (Vision 4), 21 subsets (Vision 5), 5-mm Gaussian postfilter), applying all appropriate corrections for normalization, dead time, scatter, random coincidences, and attenuation. The first  $^{15}\text{O}$ -H<sub>2</sub>O scan was an examination for resting MBF (n=10) whereas the second scan was performed as an adenosine stress test to determine maximal MBF (n=9) and MFR (n=9).

The 27-minute  $^{11}\text{C}$ -acetate scan (n=10) was begun at time = 30 min with frame structure: 1×10, 12×5, 5×10, 2×30, 3×60, 3×120, and 3×300 s. Data were reconstructed with a 3D iterative algorithm (3 iterations (Vision 4), 21 subsets (Vision 5), 5-mm Gaussian postfilter). Blood pressure and heartrate was measured during the examination at time = 1, 5, 10, and 20 minutes.

The  $^{11}\text{C}$ -palmitate scan (n=12) was initiated at time = 130 min in a 50-minute list mode scan (frame structure 6×5, 6×10, 3×20, 5×30, 5×60, 8×150, 4×300 s). Data were reconstructed with a 3D iterative algorithm (3 iterations (Vision 4), 21 subsets (Vision 5), 5-mm Gaussian postfilter). Blood and dynamic PET data were decay corrected to scan start.

The 50-minute  $^{18}\text{F}$ -FDG scan (n=11)) was initiated at time = 230 min. 200 MBq  $^{18}\text{F}$ -FDG was injected and a 50-minute list mode scan (frame structure 1×10, 8×5, 4×10, 3×20, 5×30, 5×60, 4×150, 4×300, and 1×600 s) was performed using 3D iterative reconstruction (3 iterations (Vision 4), 21 subsets (Vision 5), 4-mm Gaussian postfilter).

### *PET image analysis*

Myocardial fatty acid metabolism was analyzed using a 3-tissue compartment model in which 3 rate constants was fitted. The input function was corrected for  $^{11}\text{C}$ -metabolites using validated population-based estimates(1) The efflux rate of  $^{11}\text{CO}_2$  was fixed to the oxidation rate and a slow esterification compartment was included. Macroparameters myocardial fatty acid oxidation (MFAO), myocardial fatty acid esterification (MFAE), and total myocardial fatty acid uptake (MFAU) were defined according to the suggestions by Bergmann(2):

$$MFAE = C_{NEFA} = \frac{k_{p1}k_{12}}{k_{1p} + k_{12} + k_{13}}$$

$$MFAO = C_{NEFA} = \frac{k_{p1}k_{13}}{k_{1p} + k_{12} + k_{13}}$$

$$MFAU = MFAE + MFAO$$

Myocardial glucose uptake (MGU) was estimated by Patlak analysis as previously described(3), with automatic segmentation of the left ventricle performed using K1 parametric images (due to low myocardial FDG retention). The relative uptake rate,  $K_i$ , was multiplied by the plasma glucose concentration to obtain absolute MGU ( $\mu\text{mol}/100 \text{ g}/\text{min}$ ). The lumped constant was not assumed to change between the two visits and was hence fixed at 1.

Myocardial oxygen consumption and efficiency were measured by  $^{11}\text{C}$ -acetate PET. The examination was performed to obtain the global clearance rate ( $k_2$ ) and to calculate  $\text{MVO}_2$  as previously described(4)

$$\text{MVO}_2 = \frac{135 \times k_2 - 0.96}{100}$$

Myocardial external efficiency, MEE, was calculated as:

$$MEE = \frac{LV \text{ external work}}{\text{Total LV } \text{MVO}_2} = \frac{(FCO \times MAP \times 1.33 \times 10^{-4})}{\text{MVO}_2 \times LV \text{ mass} \times 20}$$

Left ventricular mass ( $LV_{\text{mass}}$ ) and forward cardiac output (FCO) was obtained from the PET dataset, whereas MAP was measured manually during the PET scan.

Rest and stress MBF were measured by  $^{15}\text{O}$ - $\text{H}_2\text{O}$  and analyzed using a previously described method allowing for highly automated calculation of parametric MBF imaging(5). In brief, parametric MBF images were generated using cluster analysis and implementation of a basis function method of the single-tissue model with additional RV spillover correction. All parametric images were automatically segmented according to the 17-segment model advocated by the American Heart Association (AHA)(6).

Left ventricular ejection fraction (LVEF) was calculated using the  $^{11}\text{C}$ -acetate scans as previously reported (7). In brief, the left ventricle was segmented automatically using parametric images of  $K_1$  (myocardial  $^{11}\text{C}$ -acetate uptake rate) and  $V_A$  (Arterial blood fraction). End Systolic Volumes (ESV) were calculated based on  $V_A > 0.7$  and End Diastolic Volume (EDV) on  $V_A > 0.175$ . LVEF calculated this way has been shown to correlate very well with LVEF measured by the Gold Standard of CMR (7).

1. Christensen NL, Jakobsen S, Schacht AC, Munk OL, Alstrup AKO, Tolbod LP, et al. Whole-Body Biodistribution, Dosimetry, and Metabolite Correction of [(11)C]Palmitate: A PET Tracer for Imaging of Fatty Acid Metabolism. *Mol Imaging*. 2017;16:1536012117734485.
2. Bergmann SR, Weinheimer CJ, Markham J, Herrero P. Quantitation of myocardial fatty acid metabolism using PET. *Journal of nuclear medicine : official publication, Society of Nuclear Medicine*. 1996;37(10):1723-30.
3. Patlak CS, Blasberg RG. Graphical evaluation of blood-to-brain transfer constants from multiple-time uptake data. Generalizations. *J Cereb Blood Flow Metab*. 1985;5(4):584-90.
4. Hansson NH, Tolbod L, Harms J, Wiggers H, Kim WY, Hansen E, et al. Evaluation of ECG-gated [11C]acetate PET for measuring left ventricular volumes, mass, and myocardial external efficiency. *Journal of Nuclear Cardiology*. 2016;23(4):670-9.
5. Harms HJ, Knaapen P, de Haan S, Halbmeijer R, Lammertsma AA, Lubberink M. Automatic generation of absolute myocardial blood flow images using [15O]H<sub>2</sub>O and a clinical PET/CT scanner. *European Journal of Nuclear Medicine and Molecular Imaging*. 2011;38(5):930-9.
6. Cerqueira MD, Weissman NJ, Dilsizian V, Jacobs AK, Kaul S, Laskey WK, et al. Standardized Myocardial Segmentation and Nomenclature for Tomographic Imaging of the Heart. *Circulation*. 2002;105(4):539-42.
7. Harms HJ, Stubkjær Hansson NH, Tolbod LP, Kim WY, Jakobsen S, Bouchelouche K, et al. Automatic Extraction of Myocardial Mass and Volume Using Parametric Images from Dynamic Nongated PET. *Journal of Nuclear Medicine*. 2016;57(9):1382-7.
